# Supplementary material for: Endothelial cells regulate alveolar morphogenesis by constructing basement membranes acting as a scaffold for myofibroblasts
Source: PubMed Central journal article supplement (PMC10912381; doi:10.1038/s41467-024-45910-y), 2024-03-04
Supplement: 41467_2024_45910_MOESM1_ESM.pdf [file 41467_2024_45910_MOESM1_ESM.pdf]

## **SUPPLEMENTARY INFORMATION**

### **Endothelial cells regulate alveolar morphogenesis by constructing basement membranes acting as a scaffold for myofibroblasts**

Haruko Watanabe-Takano, Katsuhiro Kato, Eri Oguri-Nakamura, Tomohiro Ishi, Koji Kobayashi, Takahisa Murata, Koichiro Tsujikawa, Takaki Miyata, Yoshiaki Kubota, Yasuyuki Hanada, Koichi Nishiyama, Tetsuro Watabe, Reinhard Fässler, Hirotaka Ishii, Naoki Mochizuki, Shigetomo Fukuhara

## INVENTORY OF SUPPLEMENTARY INFORMATION

Supplementary Figures 1-7

Supplementary Tables 1-3

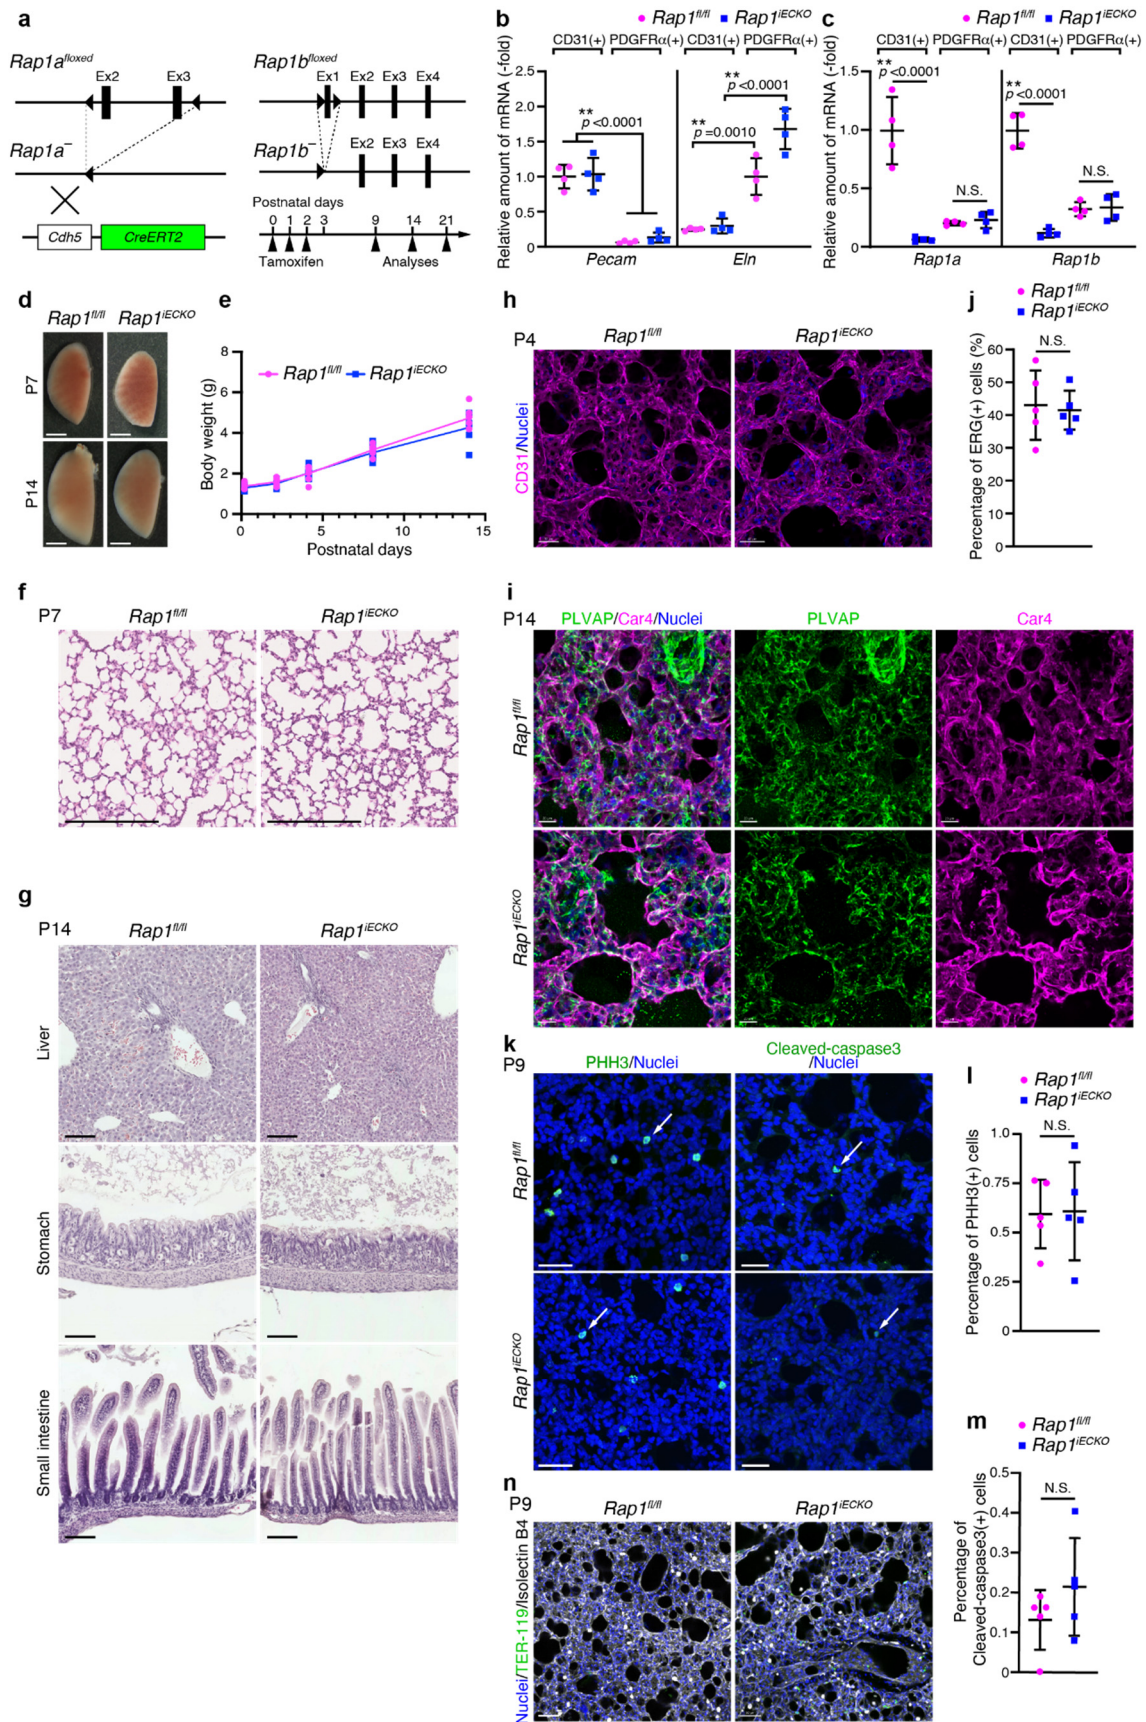

**Supplementary Fig. 1. Alveolar capillary networks develop normally in *Rap1<sup>iECKO</sup>* mice.**

- a**, Generation of mice lacking both *Rap1a* and *Rap1b* specifically in ECs (*Rap1<sup>iECKO</sup>*). Schematic representations of *Rap1a* floxed and knockout alleles (left) and *Rap1b* floxed and knockout alleles (right). In *Rap1a* and *Rap1b* floxed alleles, exons 2 to 3 and exon 1 are flanked by two loxP sites, respectively. To generate *Rap1<sup>iECKO</sup>* mice, the progenies obtained by crossing the double-floxed *Rap1a/b* mice with the mouse line expressing CreERT2 recombinase under the control of the *Cdh5* promoter (*Cdh5-CreERT2*) were administered with tamoxifen for three consecutive days from P0 through the lactating dam. Analyses were conducted at P9, P14, and P21 as indicated in the Figure legends.
- b**, Expression levels of *Pecam1* (left) and *Eln* (right) in CD31(+) cells or PDGFR $\alpha$ (+) cells isolated from the lungs of *Rap1<sup>fl/fl</sup>* and *Rap1<sup>iECKO</sup>* mice at P9 analyzed by quantitative PCR relative to that of *Actb* (n = 4 mice/each).
- c**, Expression levels of *Rap1a* (left) and *Rap1b* (right) in CD31(+) cells or PDGFR $\alpha$ (+) cells isolated from the lungs of *Rap1<sup>fl/fl</sup>* and *Rap1<sup>iECKO</sup>* mice at P9 are shown as in **b** (n = 4 mice/each).
- d**, Appearances of the left lungs from *Rap1<sup>fl/fl</sup>* and *Rap1<sup>iECKO</sup>* mice at P7 and P14. Note that the *Rap1<sup>iECKO</sup>* mouse lung is smaller than the control mouse lung at P14, but not at P7.
- e**, Growth curves of *Rap1<sup>fl/fl</sup>* and *Rap1<sup>iECKO</sup>* neonatal mice from 1 to 14 days of age. Data are means  $\pm$  s.d. (n = 7 mice/each).
- f**, Images of HE-stained lungs of *Rap1<sup>fl/fl</sup>* and *Rap1<sup>iECKO</sup>* mice at P7. Note that alveolar spaces are similar in *Rap1<sup>fl/fl</sup>* and *Rap1<sup>iECKO</sup>* mice.
- g**, Images of HE-stained liver (upper), stomach (middle) and small intestine (lower) of *Rap1<sup>fl/fl</sup>* and *Rap1<sup>iECKO</sup>* mice at P14.
- h**, Confocal z-projection images of distal lungs stained with anti-CD31 antibody (magenta) and DAPI (Nuclei, blue) from *Rap1<sup>fl/fl</sup>* and *Rap1<sup>iECKO</sup>* mice at P4. The merged images are shown.
- i**, Confocal z-projection images for PLVAP (green), Car4 (magenta), and Nuclei (DAPI, blue) in alveoli from *Rap1<sup>fl/fl</sup>* and *Rap1<sup>iECKO</sup>* mice at P14.
- j**, Percentages of ERG(+) cells relative to the total number of cells in *Rap1<sup>fl/fl</sup>* and *Rap1<sup>iECKO</sup>* lungs at P9 (n = 5 mice/each).
- k**, Confocal z-projection images for PHH3 (left, green) and Cleaved-caspase3 (right, green) in alveoli from *Rap1<sup>fl/fl</sup>* and *Rap1<sup>iECKO</sup>* mice at P9. Nuclei (blue) were also stained by DAPI.
- l**, **m**, Percentages of PHH3(+) cells (**l**) and Cleaved-caspase-3(+) cells (**m**) relative to the total number of cells, as in **k** (n = 5 mice/each).
- n**, Confocal z-projection images for TER119 (green), isolectin B4 (white), and Nuclei

(DAPI, blue) in alveoli from *Rap1<sup>fl/fl</sup>* and *Rap1<sup>iECKO</sup>* mice at P9. Note that there is no leakage of TER-119-labeled erythrocytes from alveolar capillaries in the *Rap1<sup>iECKO</sup>* mouse.

Each dot represents an individual mouse, and data are means  $\pm$  s.d. (**b, c, j, l, m**). N.S., no significance;  $**P < 0.01$ . Statistical significance was determined by one-way ANOVA followed by Tukey's post-hoc test (**b, c**) and by two tailed Student's *t*-test (**e, j, l, m**). Scale bars; 0.5 mm (**d**), 250  $\mu$ m (**f**), 100  $\mu$ m (**g**), 20  $\mu$ m (**i**), 30  $\mu$ m (**h, k**), 50  $\mu$ m (**n**). Source data are provided as a Source data file.

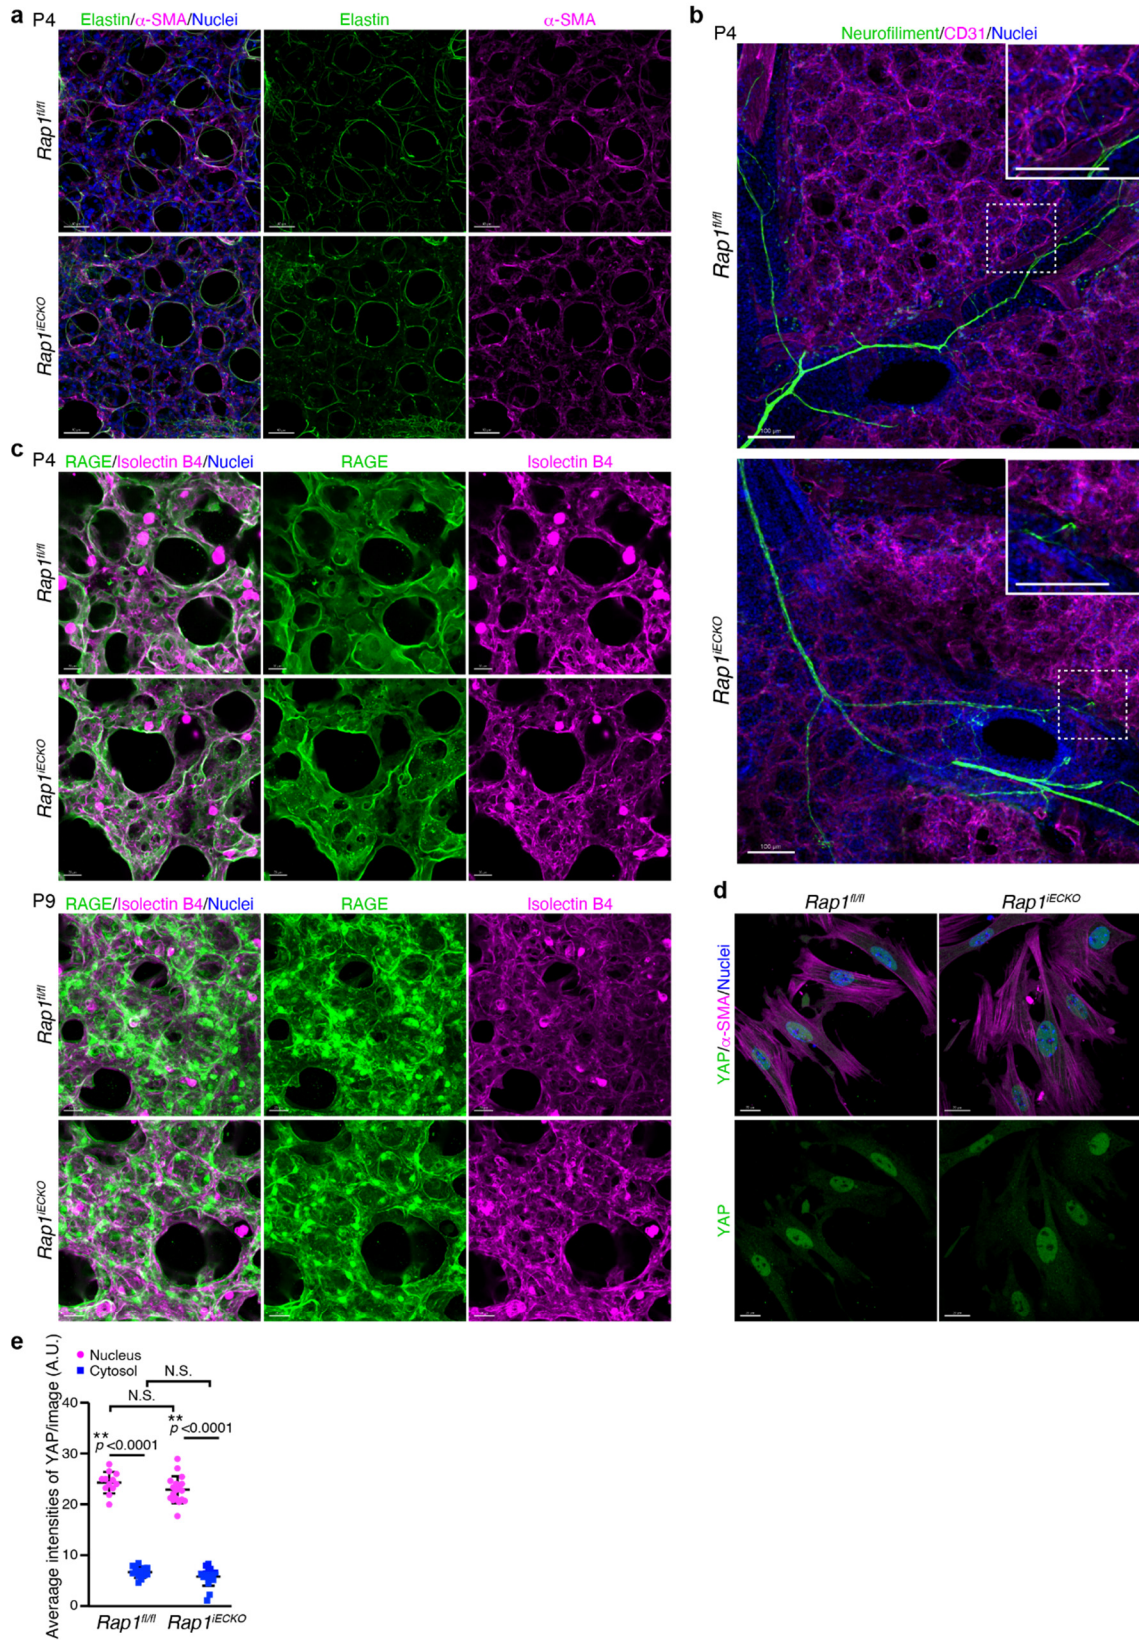

**Supplementary Fig. 2. Alveolar cells are present during postnatal lung development in *Rap1<sup>iECKO</sup>* mice.**

- a**, Confocal z-projection images for Elastin (green),  $\alpha$ -SMA (magenta), and Nuclei (DAPI, blue) in alveoli from *Rap1<sup>fl/fl</sup>* and *Rap1<sup>iECKO</sup>* mice at P4.
- b**, Confocal z-projection images for neurofilament (green), CD31 (magenta), Nuclei (DAPI, blue) in alveoli from *Rap1<sup>fl/fl</sup>* and *Rap1<sup>iECKO</sup>* mice at P4.
- c**, Confocal z-projection images for RAGE (green), isolectin B4 (magenta), and Nuclei (DAPI, blue) in alveoli from *Rap1<sup>fl/fl</sup>* and *Rap1<sup>iECKO</sup>* mice at P4 (upper) and P9 (lower).
- d, e**, Cellular localization of YAP in PDGFR $\alpha$ -positive cells isolated from the lungs of *Rap1<sup>fl/fl</sup>* and *Rap1<sup>iECKO</sup>* mice at P9. **d**, Confocal fluorescence images for YAP (green),  $\alpha$ -SMA (magenta), and Nuclei (DAPI, blue) in PDGFR $\alpha$ -positive cells isolated from the lungs of P9 *Rap1<sup>fl/fl</sup>* and *Rap1<sup>iECKO</sup>* mice and cultured on glass-base dishes for 48 h.
- e**, Quantification of cytoplasmic and nuclear localization of YAP in the PDGFR $\alpha$ -positive cells (arbitrary units, A.U.), as in **d**. Data indicate the average fluorescence intensity of YAP in the cytoplasmic (blue) and nuclear (pink) areas of PDGFR $\alpha$ -positive cells. Data are means  $\pm$  s.d. (*Rap1<sup>fl/fl</sup>*, n = 114 cells from 12 images; *Rap1<sup>iECKO</sup>*, n = 85 cells from 18 images).
- N.S., no significance; \*\* $P < 0.01$ , by one-way ANOVA followed by Tukey's post-hoc test (**e**). Scale bars; 40  $\mu$ m (**a**), 100  $\mu$ m (**b**), 20  $\mu$ m (**c, d**). Source data are provided as a Source data file.

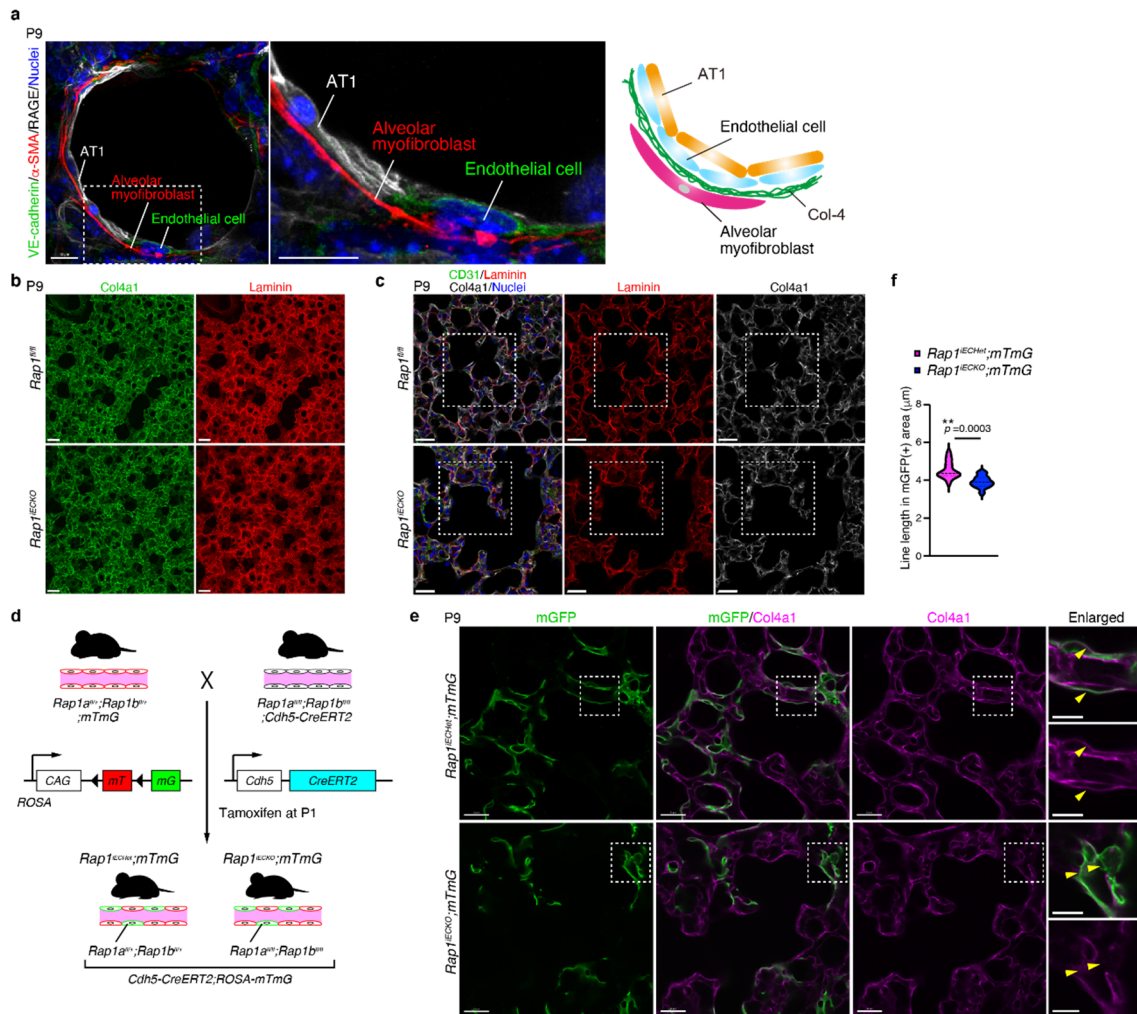

### Supplementary Fig. 3. Endothelial Rap1 regulates recruitment of Col-4 into BMs.

**a**, Representative 10  $\mu\text{m}$  slice images of an alveolus stained with anti-VE-cadherin (green), anti- $\alpha$ -SMA (red), and anti-RAGE (white) antibodies and DAPI (Nuclei, blue) from a *Rap1<sup>fl/fl</sup>* mouse at P9. Boxed areas are enlarged at the right. The schematic diagram of alveolar structure is shown on the right. Note that capillary ECs surround alveolar type I (AT1) cells to form the alveolus, and myofibroblasts further cover the outside of the alveolus via tight contact with ECs.

**b**, Confocal z-projection images for Col4a1 (left, green) and Laminin (right, red) in alveoli from *Rap1<sup>fl/fl</sup>* and *Rap1<sup>iECKO</sup>* mice at P9.

**c**, Single slice images for CD31 (green), Laminin (red), Col4a1 (white), and Nuclei (DAPI, blue) in alveoli from *Rap1<sup>fl/fl</sup>* and *Rap1<sup>iECKO</sup>* mice at P9. Boxed areas are enlarged in Fig. 3b.

**d**, Schematic representation showing the procedure for performing mosaic deletion of *Rap1a* and *Rap1b* in ECs. The detailed procedure is described in the Methods.

**e, f**, Localization of assembled Col4a1 near control and *Rap1a/b*-deficient alveolar ECs.

**e**, Single slice images for mGFP (green) and Col4a1 (magenta) alveoli from P9 *Rap1<sup>iECHet</sup>;mTmG* and *Rap1<sup>iECKO</sup>;mTmG* pups that received a low dose of tamoxifen. The mGFP signal indicates control and *Rap1a/b*-deficient alveolar ECs in *Rap1<sup>iECHet</sup>;mTmG* and *Rap1<sup>iECKO</sup>;mTmG* pups, respectively. Boxed areas are enlarged on the right. Note that Col4a1 near *Rap1a/b*-deficient alveolar ECs exhibited reduced assembly, as compared to that in control ECs. **f**, Line lengths of Col4a1 signal in mGFP-positive ECs, as in **e**, were expressed as violin plots (*Rap1<sup>iECHet</sup>;mTmG*; n = 15 images from 3 mice, *Rap1<sup>iECKO</sup>;mTmG*; n = 13 images from 3 mice). Bold and thin dashed lines indicate the median and quartiles, respectively. \*\**P* < 0.01, by two-tailed Student's *t*-test.

Scale bars; 10  $\mu$ m (**a** and **e** in enlarged), 50  $\mu$ m (**b**), 30  $\mu$ m (**c**), 20  $\mu$ m (**e**). Source data are provided as a Source data file.



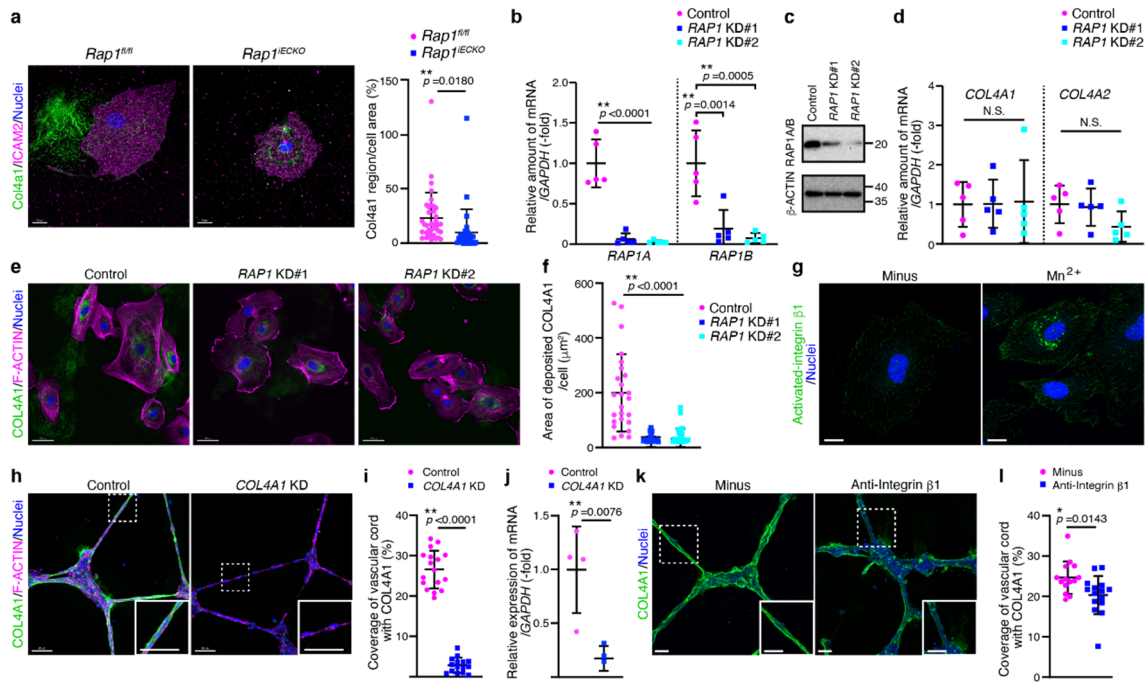

### Supplementary Fig. 4. EC-derived Col-4 accumulates around vascular cord structures.

**a**, Left, confocal fluorescence images for Col4a1 (green), ICAM2 (magenta), and Nuclei (DAPI, blue) in ECs isolated from lungs of P9 *Rap1<sup>fl/fl</sup>* and *Rap1<sup>iECKO</sup>* mice and cultured on collagen-coated dishes for at 48 h. The cells were permeabilized prior to antibody staining. Right, the amount of Col4a1 assembled on the dish was quantified as described in Fig. 5b. Data are means  $\pm$  s.d. (*Rap1<sup>fl/fl</sup>*, n = 46 cells from 3 mice; *Rap1<sup>iECKO</sup>*, n = 41 cells from 3 mice).

**b, c**, Assessment of siRNA-mediated knockdown of *RAPIA* and *RAP1B* in HUVECs by quantitative PCR analysis and Western blot analysis. HUVECs were transfected with either control siRNA or two different sets of siRNA mixtures targeting both *RAPIA* and *RAP1B* (*RAP1* KD#1, *RAP1* KD#2). **b**, Amounts of *RAPIA* (left) and *RAP1B* (right) mRNAs, normalized by that of *GAPDH*, are expressed relative to those in control group (n = 5 experiments for each group). **c**, Western blot analysis of *RAP1A/RAP1B* (upper) and  $\beta$ -Actin (lower) using the antibody that recognizes both *RAP1A* and *RAP1B* and anti- $\beta$ -Actin antibody.

**d**, Effects of *RAPIA* and *RAP1B* knockdown on the expression levels of *COL4A1* and *COL4A2* mRNAs. Amounts of *COL4A1* (left) and *COL4A2* (right) mRNAs, normalized by that of *GAPDH*, are expressed relative to those in control group (n = 5 experiments for each group).

**e**, Confocal fluorescence images for *COL4A1* (green), F-actin (magenta), and Nuclei (DAPI, blue) in HUVECs transfected with the indicated siRNAs and cultured on

collagen-coated dishes for 24 h. The cells were permeabilized prior to antibody staining. **f**, The amounts of COL4A1 assembled on the dish, as in **e**, are shown as a COL4A1-positive area divided by the number of cells in each image field (control, n = 301 cells from 26 images; *RAP1* KD #1, n = 293 cells from 26 images; *RAP1* KD #2, n = 313 cells from 28 images).

**g**, Fluorescence images for activated integrin  $\beta$ 1 (green) and Nuclei (DAPI, blue) in HUVECs cultured on collagen-coated dishes without (left) and with (right) 0.5 mM MnCl<sub>2</sub> for 6 h.

**h**, Confocal z-projection images for COL4A1 (green), F-actin (magenta), and Nuclei (DAPI, blue) in vascular cord structures constructed by HUVECs transfected with control siRNA or *COL4A1* siRNA and cultured on Matrigel for 36 h. Boxed areas are enlarged in the insets.

**i**, Percentages of coverage of vascular cord structures with COL4A1, as in **h**, are presented as a percentage relative to the total vascular cord area (n = 17 images/each).

**j**, Expression levels of *COL4A1* in the HUVECs transfected with control or *COL4A1* siRNA, analyzed by quantitative PCR relative to that of *GAPDH*. (n = 4 experiments/each).

**k**, Confocal z-projection images for COL4A1 (green) and Nuclei (DAPI, blue) in vascular cord structures constructed by HUVECs cultured on Matrigel in the absence (Minus) and presence (Anti-integrin  $\beta$ 1) of blocking antibody against integrin  $\beta$ 1 (mAb13). Boxed areas are enlarged in the insets.

**l**, Percentages of coverage of vascular cord structures with COL4A1, as in **k**, are shown as in **i** (n = 14 images/each).

Each dot represents the result of an individual experiment (**b**, **d**, **j**) and an individual image field (**f**, **i**, **l**), and data are presented as means  $\pm$  s.d.

N.S., no significance; \*\* $P < 0.01$ , \* $P < 0.05$ , by two-tailed Student's *t*-test (**a**, **i**, **j**, **l**) or one-way ANOVA followed by Tukey's post-hoc test (**b**, **d**, **f**). Scale bars; 80  $\mu$ m (**h**), 50  $\mu$ m (**e** and **k**), 20  $\mu$ m (**a** and **g**) and 10  $\mu$ m (enlarged image in **k**). Source data are provided as a Source data file.

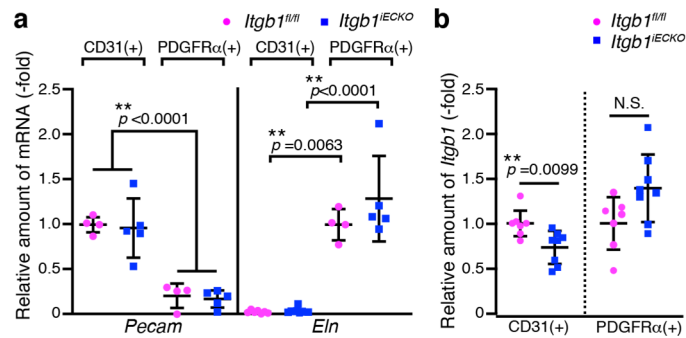

**Supplementary Fig. 5. *Itgb1* is partially, but significantly, decreased in ECs isolated from the lungs of *Itgb1<sup>iECKO</sup>* mice.**

**a**, Expression levels of *Pecam1* (left) and *Eln* (right) in CD31(+) cells and PDGFRα(+) cells isolated from the lungs of *Itgb1<sup>fl/fl</sup>* and *Itgb1<sup>iECKO</sup>* mice at P9 were analyzed by quantitative PCR. The values are presented relative to that of *Actb*. Each dot represents an individual mouse. Data are means ± s.d. (*Itgb1<sup>fl/fl</sup>*, n = 4 mice; *Itgb1<sup>iECKO</sup>*, n = 5 mice).

**b**, Expression levels of *Itgb1* in CD31(+) cells and PDGFRα(+) cells isolated from the lungs of *Itgb1<sup>fl/fl</sup>* and *Itgb1<sup>iECKO</sup>* mice at P9 are shown as in **a**. Data are means ± s.d. (*Itgb1<sup>fl/fl</sup>*, n = 7 mice; *Itgb1<sup>iECKO</sup>*, n = 8 mice).

N.S., no significance; \*\* $P < 0.01$ , by one-way ANOVA followed by Tukey's post-hoc test (**a**) or two-tailed Student's *t*-test (**b**). Source data are provided as a Source data file.

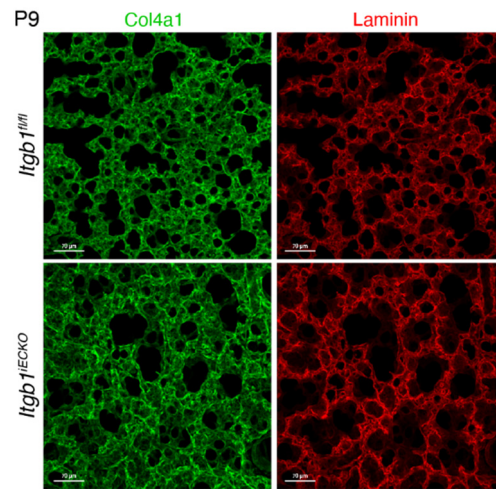

**Supplementary Fig. 6. Endothelial integrin  $\beta 1$  generates BMs by recruiting Col-4 and laminin.**

Confocal z-projection images for Col4a1 (left, green) and laminin (right, red) in alveoli from *Itgb1<sup>fl/fl</sup>* and *Itgb1<sup>ECKO</sup>* mice at P9. Scale bars; 20  $\mu\text{m}$ .

**a Quantification of the score for  $\alpha$ -SMA bundles**

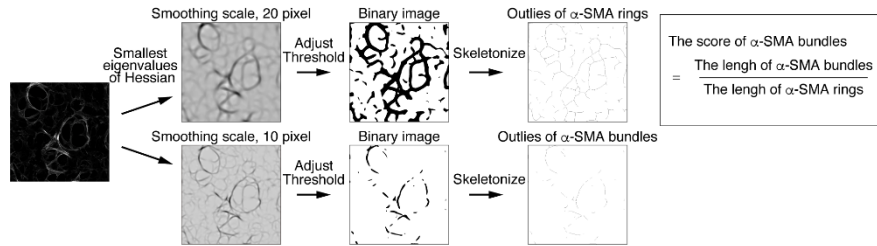

1. Open original 3D image of Cy3- $\alpha$ -SMA. Create Z-projection and convert the image into 8-bit on Fiji software.
2. Compute the smallest eigenvalue of Hessian tensor to extract outlines of alveolar rings, using external plug-in, FeatureJ. Gaussian derivatives (the standard deviation  $\sigma=20$  pixels) were calculated in the process.
3. Binarize by adjusting a threshold  $< -0.16$ .
4. Execute "skeletonize" and save the image as outlines of  $\alpha$ -SMA rings.
5. Using the z-stacked image, compute the smallest eigenvalue of Hessian tensor to extract outlines of  $\alpha$ -SMA bundles. Gaussian derivatives (the standard deviation  $\sigma=10$  pixels) were calculated in the process.
6. Binarize by adjusting a threshold  $< -3.0$ .
7. Execute skeletonize and save the image as Outlines for  $\alpha$ -SMA bundles.
8. The length of outline was measured by a manual tracking in the above images.
9. Calculate the values from the length of " $\alpha$ -SMA bundles" divided by the corresponding " $\alpha$ -SMA rings" in each ring.

**b Quantification of the cytosolic and nuclear localization of YAP.**

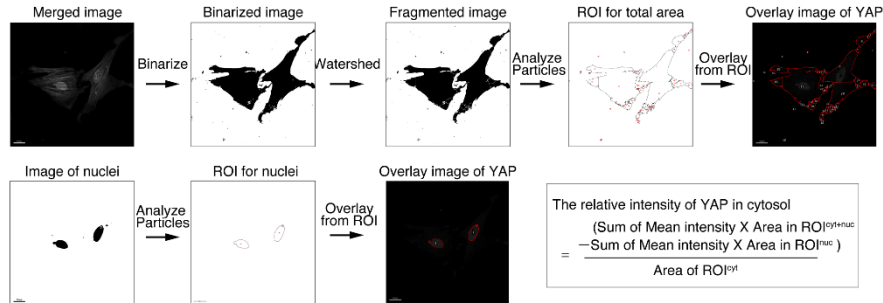

1. Open a merged image on Fiji software, convert scale to 8 bit and adjust the lower limit threshold to 10.
2. Execute "Watershed" in the process and run "Analyze Particles" with the size setting as 2-infinity and add to ROI manager. (ROI<sup>cyt+nucl</sup>)
3. Overlay ROI<sup>cyt+nucl</sup> on original YAP image, run Measure and calculate the area as well as the intensity of each ROI<sup>cyt+nucl</sup>.
4. Open the corresponding image of nuclei on Fiji software, convert scale to 8 bit and adjust the lower limit of "Threshold" to 10.
5. Set scale, execute "Analyze Particles" with the size setting as 10-infinity and add to ROI manager as ROI<sup>nucl</sup>.
6. Overlay ROI<sup>cyt+nucl</sup> on original YAP image, run "Measure" and calculate the area as well as the intensity of each ROI<sup>nucl</sup>.
7. Calculate total intensity for each ROI<sup>cyt+nucl</sup> as well as ROI<sup>nucl</sup>.
8. Estimate total intensity and area of ROI<sup>cyt</sup> by subtracting total intensity and total area of ROI<sup>nucl</sup> from ROI<sup>cyt+nucl</sup>.
9. Divide total intensity by total area of ROI<sup>cyt</sup> as "Mean intensity" of ROI<sup>cyt</sup>.

**c Quantification of the thickness of Elastin fibers.**

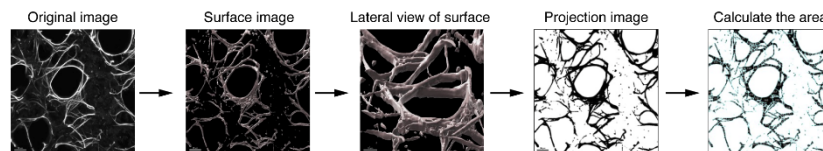

1. Open an original image on Imaris software, make a surface against the staining with Alexa Fluor 633™ Hydrzide.
2. The volumes were calculated automatically on imaris software.
3. Open the same image on Fiji and make projection image.
4. Set scale, adjust threshold of the lower limit to 30, run water shed for the calculation of binarize the image.
5. The segmented image is further processed by the function, "Analyze particles" and execute "Measure" to calculate the area.
6. Elastin thickness is calculated as the division from the total volume of surface/the total area on Fiji.

**d Quantification of the ratio of activated to total integrin  $\beta 1$  in the plasma membrane of endothelial cells.**

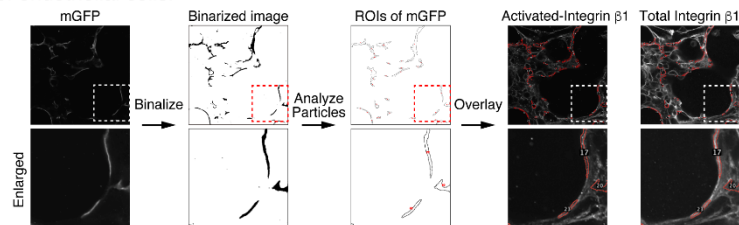

1. Convert the all channels of images into 8 bit scale.
2. Define mGFP-positive area by binarization setting the lower limit as 30.
3. Set scale, run the function, analyze particles and add to ROIs to ROI manager. (Parameters; size,1.5-Infinity, check, Add to Manager)
4. Overlay ROIs from ROI manager onto the both images from activated-Integrin  $\beta 1$  and total Integrin  $\beta 1$ .
5. Measure Mean intensities without modification in each ROI.
6. Calculate the ratio by division of the mean intensity from activated-Integrin  $\beta 1$  by total Integrin  $\beta 1$  in each ROI. Lower panels show enlarged images of the boxed area.

**Supplementary Fig. 7. Schematic representation of the protocols for data quantification.**

**a**, Protocol to quantify the score of  $\alpha$ -SMA bundles in Fig. 2d.

**b**, Protocol to quantify the cytoplasmic and nuclear localizations of YAP in Fig. 2h and Supplementary Fig. 2e.

**c**, Protocol to quantify the thickness of Elastin fibers in Fig. 3i.

**d**, Protocol to quantify the ratio of activated to total Integrin  $\beta$ 1 in mGFP-labeled plasma membranes of ECs in Fig. 4g.

## Supplemental Tables

### Supplementary Table 1. Antibodies and probes used for this study

#### Primary antibodies for IF

| Protein name (clone name)            | Company                                     | Product number |
|--------------------------------------|---------------------------------------------|----------------|
| AlexaFluorTM647-ERG                  | Abcam                                       | Ab196149       |
| Carbonic Anhydrase 4                 | R&D Systems                                 | AF2414         |
| CD29 Rat anti-Mouse activated        | BD Biosciences                              | 553715         |
| CD29 Rat anti-Human mAb13            | Merk Millipore                              | MABT821        |
| CD31(Pecam1)                         | Merk Millipore                              | MAB1398        |
|                                      | BD Biosciences                              | 550274         |
|                                      | R&D SYSTEMS                                 | AF3628         |
| Col4a1                               | Merk Millipore                              | AB769          |
|                                      | Abcam                                       | Ab6586         |
| Cy3- $\alpha$ -SMA                   | Sigma-Aldrich                               | C6198          |
| GFP                                  | Thermo Fisher Scientific                    | A11122         |
| ICAM2/CD102                          | BD Biosciences                              | 553326         |
| Integrin $\beta$ 1                   | R&D Systems                                 | AF2405         |
| Laminin                              | Sigma-Aldrich                               | L9393          |
| Neurofilament(NF-M)                  | Developmental Studies Hybridoma Bank (DSHB) | 2H3            |
| Phospho-Myosin Light Chain 2 (Ser19) | Cell Signaling Technology                   | 3671           |
| PLVAP                                | BD Biosciences                              | 553849         |
| RAGE                                 | R&D Systems                                 | MAB1179        |
| Vincullin (VIN-11-5)                 | Sigma-Aldrich                               | SAB4200729     |
| YAP                                  | Novus biologicals                           | NB110-58358    |

#### Probes for IF

| Product name                | Company                  | Product number |
|-----------------------------|--------------------------|----------------|
| AlexaFluorTM647-GS-IB4      | Thermo Fisher Scientific | I32450         |
| Alexa FluorTM 633-Hydrazide | Thermo Fisher Scientific | 10216442       |
| Rhodamine Phalloidin        | Thermo Fisher Scientific | R415           |

#### Antibody for FACS

| Protein name                                                 | Company                  | Product number |
|--------------------------------------------------------------|--------------------------|----------------|
| FITC anti-mouse TER119/Erythroid Antibody                    | BioLegend Inc.           | 116205         |
| FITC anti-mouse CD45 Antibody                                | BioLegend Inc.           | 103107         |
| FITC anti-mouse CD326(Ep-CAM) Antibody                       | BioLegend Inc.           | 118207         |
| PE anti-mouse CD31 Antibody                                  | BioLegend Inc.           | 102507         |
| CD140a(PDGFRA) Monoclonal Antibody (APA5), APC, eBioscience™ | Thermo Fisher Scientific | 17-1401-81     |

#### Primary antibody for WB

| Protein name (clone name) | Company           | Product number |
|---------------------------|-------------------|----------------|
| $\beta$ -actin (Ab-5)     | BD Bioscience     | 612656         |
| Col4a1                    | Abcam             | Ab6586         |
| Col4a1                    | Merk Millipore    | Ab769          |
| YAP                       | Novus biologicals | NB110-58358    |

#### Secondary antibody for WB

| Product name                                        | Company     | Product number |
|-----------------------------------------------------|-------------|----------------|
| Anti-Mouse IgG, HRP-Linked Whole Ab Sheep           | cytiva      | NA931          |
| Anti-Rabbit IgG, HRP-Linked Whole Ab Donkey         | cytiva      | NA934          |
| HRP-conjugated Affinipure Rabbit Anti-Goat IgG(H+L) | proteintech | SA00001-4      |

## Supplementary Table 2. Primer sequences for qPCR and genotyping and siRNA sequences

### qPCR

| Gene    | F/R     | Sequence                 | Organism |
|---------|---------|--------------------------|----------|
| Actb    | Forward | GTGACGTTGACATCCGTAAAGA   | Mouse    |
|         | Reverse | GCCGGACTCATCGTACTCC      |          |
| Rap1a   | Forward | GCATCATGCGTGAGTACAAG     | Mouse    |
|         | Reverse | ACCTCGACTTGCTTTCTGTAG    |          |
| Rap1b   | Forward | GTGAATATAAGCTCGTCGTGC    | Mouse    |
|         | Reverse | ACACTGCTGTGCATCTACTTC    |          |
| Itgb1   | Forward | ATGAATTTGCAACTGGTTTCCTG  | Mouse    |
|         | Reverse | CAGAAGTAGGCATTCTTCTTGC   |          |
| Elastin | Forward | ATGGCGGGTCTGACAGCGGTAG   | Mouse    |
|         | Reverse | GGTTTTCTTCCAGGTCCCAGAG   |          |
| Pecam1  | Forward | CCATGGAAGAAAGGGCTCATTGC  | Mouse    |
|         | Reverse | CGTAATGGCTGTTGGCTTCCA    |          |
| Col4a1  | Forward | GCAGAGATGGTCTTGAAGGATTGC | Mouse    |
|         | Reverse | AGTTCCTGCTCTTCTGGCATG    |          |
| Col4a2  | Forward | GGTTTTCTGGCCTTGATGGAGA   | Mouse    |
|         | Reverse | ATGGATGGGGCGAGTAGACAGA   |          |
| COL4A1  | Forward | GGATGCTGTTGAAAGGTGAAAGA  | Human    |
|         | Reverse | GGTGGTCCGAAATCCTGG       |          |
| COL4A2  | Forward | TTGGCGGGTGTGAAGAAGTTT    | Human    |
|         | Reverse | CCTTGTCTCCTTTACGTCCTG    |          |
| GAPDH   | Forward | ATGGGGAAGGTGAAGGTCG      | Human    |
|         | Reverse | GGGGTCATTGATGGCAACAATA   |          |

### Genotyping

| Gene         | F/R     | Sequence                    | Organism |
|--------------|---------|-----------------------------|----------|
| Rap1a flox   | Forward | GATGGCCAAGGCTCTCAGT         | Mouse    |
|              | Reverse | CGTATATGAGTGCTTTATCTGCAC    |          |
| Rap1b flox   | Forward | TGCCCTCTCATGCTATTCT         | Mouse    |
|              | Reverse | TTCAAAGTGCGTGCTGTCTC        |          |
| Cdh5-CreERT2 | Forward | TGCCTATCCTCTTTCCCAGAT       | Mouse    |
|              | Reverse | CATTGCTGTCACTTGGTCGTG       |          |
| Ingβ flox    | Forward | AGG TGC CCT TCC CTC TAG A   | Mouse    |
|              | Reverse | GTG AAG TAG GTG AAA GGT AAC |          |

### siRNA Target sequence

| siRNA name (Target) | Sequence            | Organism |
|---------------------|---------------------|----------|
| #1 RAP1A            | GCAAGACAGUGGUGUAACU | Human    |
| #1 RAP1B            | GGACAAGGAUUUGCAUUAG |          |
| #2 RAP1A            | GCGAGUAGUUGGCAAAGAG |          |
| #2 RAP1B            | AAAAUACGAUCCUACGAUA |          |
| COL4A1              | CAAAGGUGUUGACGGCUUA | Human    |
|                     | CGCAAACGCUUACAGCUUU |          |
|                     | AGAGUUGCCUCAUCUGUGA |          |
|                     | GGGCAUGCCUGGUAUUGGU |          |



**Supplementary Table 3. Detailed statistics**

| Figure                              | Subject               | n       | Comparison                                   | Significance | Adjusted p value |
|-------------------------------------|-----------------------|---------|----------------------------------------------|--------------|------------------|
| Fig. 1a                             | Rap1 <sup>flf</sup>   | 22 mice |                                              |              |                  |
|                                     | Rap1 <sup>iECKO</sup> | 22 mice |                                              |              |                  |
|                                     |                       |         | Rap1 <sup>flf</sup> vs Rap1 <sup>iECKO</sup> | **           | <0.0001          |
| Fig. 1c                             | Rap1 <sup>flf</sup>   | 6 mice  |                                              |              |                  |
|                                     | Rap1 <sup>iECKO</sup> | 6 mice  |                                              |              |                  |
|                                     |                       |         | Rap1 <sup>flf</sup> vs Rap1 <sup>iECKO</sup> | **           | 0.0026           |
| Fig. 1e                             | Rap1 <sup>flf</sup>   | 6 mice  |                                              |              |                  |
|                                     | Rap1 <sup>iECKO</sup> | 9 mice  |                                              |              |                  |
|                                     |                       |         | Rap1 <sup>flf</sup> vs Rap1 <sup>iECKO</sup> | **           | 0.0002           |
| Fig. 2b<br>[PDGFRα(+)]              | Rap1 <sup>flf</sup>   | 6 mice  |                                              |              |                  |
|                                     | Rap1 <sup>iECKO</sup> | 8 mice  |                                              |              |                  |
|                                     |                       |         | Rap1 <sup>flf</sup> vs Rap1 <sup>iECKO</sup> | N.S.         | 0.4794           |
| Fig. 2b<br>[PDGFRα(+)/α-<br>SMA(+)] | Rap1 <sup>flf</sup>   | 6 mice  |                                              |              |                  |
|                                     | Rap1 <sup>iECKO</sup> | 8 mice  |                                              |              |                  |
|                                     |                       |         | Rap1 <sup>flf</sup> vs Rap1 <sup>iECKO</sup> | N.S.         | 0.7561           |
| Fig. 2b<br>[α-SMA(+)]               | Rap1 <sup>flf</sup>   | 6 mice  |                                              |              |                  |
|                                     | Rap1 <sup>iECKO</sup> | 8 mice  |                                              |              |                  |
|                                     |                       |         | Rap1 <sup>flf</sup> vs Rap1 <sup>iECKO</sup> | N.S.         | 0.5908           |
| Fig. 2d                             | Rap1 <sup>flf</sup>   | 8 mice  |                                              |              |                  |
|                                     | Rap1 <sup>iECKO</sup> | 6 mice  |                                              |              |                  |
|                                     |                       |         | Rap1 <sup>flf</sup> vs Rap1 <sup>iECKO</sup> | *            | 0.0219           |
| Fig. 2f                             | Rap1 <sup>flf</sup>   | 5 mice  |                                              |              |                  |
|                                     | Rap1 <sup>iECKO</sup> | 5 mice  |                                              |              |                  |
|                                     |                       |         | Rap1 <sup>flf</sup> vs Rap1 <sup>iECKO</sup> | **           | 0.0002           |
| Fig. 2h<br>[α-SMA(+)]               | Rap1 <sup>flf</sup>   | 6 mice  |                                              |              |                  |
|                                     | Rap1 <sup>iECKO</sup> | 8 mice  |                                              |              |                  |
|                                     |                       |         | Rap1 <sup>flf</sup> vs Rap1 <sup>iECKO</sup> | N.S.         | 0.2088           |
| Fig. 2h<br>[YAP(+)]                 | Rap1 <sup>flf</sup>   | 6 mice  |                                              |              |                  |
|                                     | Rap1 <sup>iECKO</sup> | 8 mice  |                                              |              |                  |
|                                     |                       |         | Rap1 <sup>flf</sup> vs Rap1 <sup>iECKO</sup> | *            | 0.0149           |
| Fig. 2b<br>[α-SMA(+)/YAP(+)]        | Rap1 <sup>flf</sup>   | 6 mice  |                                              |              |                  |
|                                     | Rap1 <sup>iECKO</sup> | 8 mice  |                                              |              |                  |
|                                     |                       |         | Rap1 <sup>flf</sup> vs Rap1 <sup>iECKO</sup> | *            | 0.0181           |
| Fig. 2j                             | Rap1 <sup>flf</sup>   | 6 mice  |                                              |              |                  |
|                                     | Rap1 <sup>iECKO</sup> | 5 mice  |                                              |              |                  |
|                                     |                       |         | Rap1 <sup>flf</sup> vs Rap1 <sup>iECKO</sup> | *            | 0.0198           |
| Fig. 2l                             | Rap1 <sup>flf</sup>   | 4 mice  |                                              |              |                  |
|                                     | Rap1 <sup>iECKO</sup> | 4 mice  |                                              |              |                  |
|                                     |                       |         | Rap1 <sup>flf</sup> vs Rap1 <sup>iECKO</sup> | N.S.         | 0.3581           |
| Fig. 3c<br>(Col4a1)                 | Rap1 <sup>flf</sup>   | 4 mice  |                                              |              |                  |
|                                     | Rap1 <sup>iECKO</sup> | 4 mice  |                                              |              |                  |

|                      |                              |                 |                                             |      |         |
|----------------------|------------------------------|-----------------|---------------------------------------------|------|---------|
|                      |                              |                 | Rap1 <sup>ff</sup> vs Rap1 <sup>iECKO</sup> | **   | 0.0007  |
| Fig. 3c<br>(Laminin) | Rap1 <sup>ff</sup>           | 4 mice          |                                             |      |         |
|                      | Rap1 <sup>iECKO</sup>        | 4 mice          |                                             |      |         |
|                      |                              |                 | Rap1 <sup>ff</sup> vs Rap1 <sup>iECKO</sup> | N.S. | 0.1741  |
| Fig. 3f              | Rap1 <sup>ff</sup>           | 6 mice          |                                             |      |         |
|                      | Rap1 <sup>iECKO</sup>        | 5 mice          |                                             |      |         |
|                      |                              |                 | Rap1 <sup>ff</sup> vs Rap1 <sup>iECKO</sup> | **   | 0.0012  |
| Fig. 3g<br>(Col4a1)  | Rap1 <sup>ff</sup>           | 3 mice          |                                             |      |         |
|                      | Rap1 <sup>iECKO</sup>        | 3 mice          |                                             |      |         |
|                      |                              |                 | Rap1 <sup>ff</sup> vs Rap1 <sup>iECKO</sup> | N.S. | 0.237   |
| Fig. 3g<br>(Col4a2)  | Rap1 <sup>ff</sup>           | 3 mice          |                                             |      |         |
|                      | Rap1 <sup>iECKO</sup>        | 3 mice          |                                             |      |         |
|                      |                              |                 | Rap1 <sup>ff</sup> vs Rap1 <sup>iECKO</sup> | N.S. | 0.3736  |
| Fig. 3g<br>(Rap1a)   | Rap1 <sup>ff</sup>           | 3 mice          |                                             |      |         |
|                      | Rap1 <sup>iECKO</sup>        | 3 mice          |                                             |      |         |
|                      |                              |                 | Rap1 <sup>ff</sup> vs Rap1 <sup>iECKO</sup> | **   | 0.0044  |
| Fig. 3g<br>(Rap1b)   | Rap1 <sup>ff</sup>           | 3 mice          |                                             |      |         |
|                      | Rap1 <sup>iECKO</sup>        | 3 mice          |                                             |      |         |
|                      |                              |                 | Rap1 <sup>ff</sup> vs Rap1 <sup>iECKO</sup> | *    | 0.0305  |
| Fig. 3i              | Rap1 <sup>ff</sup>           | 3 mice          |                                             |      |         |
|                      | Rap1 <sup>iECKO</sup>        | 3 mice          |                                             |      |         |
|                      |                              |                 | Rap1 <sup>ff</sup> vs Rap1 <sup>iECKO</sup> | *    | 0.022   |
| Fig. 3j              | Rap1 <sup>ff</sup>           | 3 mice          |                                             |      |         |
|                      | Rap1 <sup>iECKO</sup>        | 3 mice          |                                             |      |         |
|                      |                              |                 | Rap1 <sup>ff</sup> vs Rap1 <sup>iECKO</sup> | N.S. | 0.9553  |
| Fig. 4b              | Rap1 <sup>ff</sup>           | 90 cells/3 mice |                                             |      |         |
|                      | Rap1 <sup>iECKO</sup>        | 71 cells/3 mice |                                             |      |         |
|                      |                              |                 | Rap1 <sup>ff</sup> vs Rap1 <sup>iECKO</sup> | **   | <0.0001 |
| Fig. 4c (0<x≤5)      | Rap1 <sup>ff</sup>           | 58 cells/3 mice |                                             |      |         |
|                      | Rap1 <sup>iECKO</sup>        | 42 cells/3 mice |                                             |      |         |
|                      |                              |                 | Rap1 <sup>ff</sup> vs Rap1 <sup>iECKO</sup> | **   | 0.0002  |
| Fig. 4c (5<x≤10)     | Rap1 <sup>ff</sup>           | 58 cells/3 mice |                                             |      |         |
|                      | Rap1 <sup>iECKO</sup>        | 42 cells/3 mice |                                             |      |         |
|                      |                              |                 | Rap1 <sup>ff</sup> vs Rap1 <sup>iECKO</sup> | **   | <0.0001 |
| Fig. 4c (10<x≤20)    | Rap1 <sup>ff</sup>           | 58 cells/3 mice |                                             |      |         |
|                      | Rap1 <sup>iECKO</sup>        | 42 cells/3 mice |                                             |      |         |
|                      |                              |                 | Rap1 <sup>ff</sup> vs Rap1 <sup>iECKO</sup> | **   | <0.0001 |
| Fig. 4c (20<x)       | Rap1 <sup>ff</sup>           | 58 cells/3 mice |                                             |      |         |
|                      | Rap1 <sup>iECKO</sup>        | 42 cells/3 mice |                                             |      |         |
|                      |                              |                 | Rap1 <sup>ff</sup> vs Rap1 <sup>iECKO</sup> | **   | <0.0001 |
| Fig. 4e              | Rap1 <sup>ff</sup>           | 32 cells/3 mice |                                             |      |         |
|                      | Rap1 <sup>iECKO</sup>        | 29 cells/3 mice |                                             |      |         |
|                      |                              |                 | Rap1 <sup>ff</sup> vs Rap1 <sup>iECKO</sup> | **   | <0.0001 |
| Fig. 4g              | Rap1 <sup>iEChet</sup> ,mTmG | 460 ROIs/3 mice |                                             |      |         |

|                              |                             |                           |                                                             |        |         |
|------------------------------|-----------------------------|---------------------------|-------------------------------------------------------------|--------|---------|
|                              | Rap1 <sup>ieCKO</sup> ;mTmG | 191 ROIs/3 mice           |                                                             |        |         |
|                              |                             |                           | Rap1 <sup>ieCHet</sup> ;mTmG vs Rap1 <sup>ieCKO</sup> ;mTmG | **     | 0.0005  |
| Fig. 5b                      | Rap1 <sup>ff</sup>          | 44 cells/3 mice           |                                                             |        |         |
|                              | Rap1 <sup>ieCKO</sup>       | 39 cells/3 mice           |                                                             |        |         |
|                              |                             |                           | Rap1 <sup>ff</sup> vs Rap1 <sup>ieCKO</sup>                 | *      | 0.0109  |
| Fig. 5d (Control)            | Minus                       | 125 cells/15 images       |                                                             |        |         |
|                              | Mn <sup>2+</sup>            | 129 cells/20 images       |                                                             |        |         |
|                              |                             |                           | Minus vs Mn <sup>2+</sup>                                   | N.S.   | 0.1816  |
| Fig. 5d (Rap1KD#1)           | Minus                       | 175 cells/23 images       |                                                             |        |         |
|                              | Mn <sup>2+</sup>            | 149 cells/20 images       |                                                             |        |         |
|                              |                             |                           | Minus vs Mn <sup>2+</sup>                                   | **     | <0.0001 |
| Fig. 5d (Rap1KD#2)           | Minus                       | 132 cells/23 images       |                                                             |        |         |
|                              | Mn <sup>2+</sup>            | 118 cells/20 images       |                                                             |        |         |
|                              |                             |                           | Minus vs Mn <sup>2+</sup>                                   | **     | 0.0005  |
| Fig. 5f (Conditioned media)  | Control                     | 3 independent experiments |                                                             |        |         |
|                              | RAP1KD#1                    | 3 independent experiments |                                                             |        |         |
|                              | RAP1KD#2                    | 3 independent experiments |                                                             |        |         |
|                              |                             |                           | Control vs RAP1KD#1                                         | N.S.   | 0.8488  |
|                              |                             |                           | Control vs RAP1KD#2                                         | N.S.   | 0.9936  |
|                              |                             | RAP1KD#1 vs RAP1KD#2      | N.S.                                                        | 0.7934 |         |
| Fig. 5f (Whole cell lysates) | Control                     | 3 independent experiments |                                                             |        |         |
|                              | RAP1KD#1                    | 3 independent experiments |                                                             |        |         |
|                              | RAP1KD#2                    | 3 independent experiments |                                                             |        |         |
|                              |                             |                           | Control vs RAP1KD#1                                         | N.S.   | 0.9924  |
|                              |                             |                           | Control vs RAP1KD#2                                         | N.S.   | 0.9064  |
|                              |                             | RAP1KD#1 vs RAP1KD#2      | N.S.                                                        | 0.8535 |         |
| Fig. 5h (Control)            | Minus                       | 10 images                 |                                                             |        |         |
|                              | Mn <sup>2+</sup>            | 8 images                  |                                                             |        |         |
|                              |                             |                           | Minus vs Mn <sup>2+</sup>                                   | N.S.   | 0.0946  |
| Fig. 5h (Rap1KD#1)           | Minus                       | 11 images                 |                                                             |        |         |
|                              | Mn <sup>2+</sup>            | 11 images                 |                                                             |        |         |

|                              |                                  |           |                                                                          |                                                                          |         |         |
|------------------------------|----------------------------------|-----------|--------------------------------------------------------------------------|--------------------------------------------------------------------------|---------|---------|
|                              |                                  |           | Minus vs Mn <sup>2+</sup>                                                | **                                                                       | 0.0065  |         |
| Fig. 5h (Rap1KD#2)           | Minus                            | 10 images |                                                                          |                                                                          |         |         |
|                              | Mn <sup>2+</sup>                 | 9 images  |                                                                          |                                                                          |         |         |
|                              |                                  |           | Minus vs Mn <sup>2+</sup>                                                | **                                                                       | 0.0007  |         |
| Fig. 6b                      | Itgb1 <sup>fl/fl</sup>           | 6 mice    |                                                                          |                                                                          |         |         |
|                              | Itgb1 <sup>ieCKO</sup>           | 6 mice    |                                                                          |                                                                          |         |         |
|                              |                                  |           | Itgb1 <sup>fl/fl</sup> vs Itgb1 <sup>ieCKO</sup>                         | **                                                                       | <0.0001 |         |
| Fig. 6e                      | Itgb1 <sup>fl/fl</sup>           | 6 mice    |                                                                          |                                                                          |         |         |
|                              | Itgb1 <sup>ieCKO</sup>           | 6 mice    |                                                                          |                                                                          |         |         |
|                              |                                  |           | Itgb1 <sup>fl/fl</sup> vs Itgb1 <sup>ieCKO</sup>                         | **                                                                       | 0.0033  |         |
| Fig. 6g<br>[α-SMA(+)]        | Itgb1 <sup>fl/fl</sup>           | 6 mice    |                                                                          |                                                                          |         |         |
|                              | Itgb1 <sup>ieCKO</sup>           | 6 mice    |                                                                          |                                                                          |         |         |
|                              |                                  |           | Itgb1 <sup>fl/fl</sup> vs Itgb1 <sup>ieCKO</sup>                         | N.S.                                                                     | 0.1816  |         |
| Fig. 6g<br>[YAP(+)]          | Itgb1 <sup>fl/fl</sup>           | 6 mice    |                                                                          |                                                                          |         |         |
|                              | Itgb1 <sup>ieCKO</sup>           | 6 mice    |                                                                          |                                                                          |         |         |
|                              |                                  |           | Itgb1 <sup>fl/fl</sup> vs Itgb1 <sup>ieCKO</sup>                         | **                                                                       | 0.0002  |         |
| Fig. 6g<br>[α-SMA(+)/YAP(+)] | Itgb1 <sup>fl/fl</sup>           | 6 mice    |                                                                          |                                                                          |         |         |
|                              | Itgb1 <sup>ieCKO</sup>           | 6 mice    |                                                                          |                                                                          |         |         |
|                              |                                  |           | Itgb1 <sup>fl/fl</sup> vs Itgb1 <sup>ieCKO</sup>                         | **                                                                       | 0.0067  |         |
| Fig. 7c (Col4a1)             | Itgb1 <sup>fl/fl</sup>           | 3 mice    |                                                                          |                                                                          |         |         |
|                              | Itgb1 <sup>ieCKO</sup>           | 6 mice    |                                                                          |                                                                          |         |         |
|                              |                                  |           | Itgb1 <sup>fl/fl</sup> vs Itgb1 <sup>ieCKO</sup>                         | *                                                                        | 0.0346  |         |
| Fig. 7c (Laminin)            | Itgb1 <sup>fl/fl</sup>           | 3 mice    |                                                                          |                                                                          |         |         |
|                              | Itgb1 <sup>ieCKO</sup>           | 6 mice    |                                                                          |                                                                          |         |         |
|                              |                                  |           | Itgb1 <sup>fl/fl</sup> vs Itgb1 <sup>ieCKO</sup>                         | N.S.                                                                     | 0.1081  |         |
| Supple. Fig. 1b<br>(Pecam1)  | Rap1 <sup>fl/fl</sup> ,CD31(+)   | 4 mice    |                                                                          |                                                                          |         |         |
|                              | Rap1 <sup>ieCKO</sup> ,CD31(+)   | 4 mice    |                                                                          |                                                                          |         |         |
|                              | Rap1 <sup>fl/fl</sup> ,PDGFRα(+) | 4 mice    |                                                                          |                                                                          |         |         |
|                              | Rap1 <sup>ieCKO</sup> ,PDGFRα(+) | 4 mice    |                                                                          |                                                                          |         |         |
|                              |                                  |           |                                                                          | Rap1 <sup>fl/fl</sup> ,CD31(+)<br>vs<br>Rap1 <sup>fl/fl</sup> ,PDGFRα(+) | **      | <0.0001 |
|                              |                                  |           |                                                                          | Rap1 <sup>fl/fl</sup> ,CD31(+)<br>vs<br>Rap1 <sup>ieCKO</sup> ,PDGFRα(+) | **      | <0.0001 |
|                              |                                  |           |                                                                          | Rap1 <sup>ieCKO</sup> ,CD31(+)<br>vs<br>Rap1 <sup>fl/fl</sup> ,PDGFRα(+) | **      | <0.0001 |
|                              |                                  |           | Rap1 <sup>ieCKO</sup> ,CD31(+)<br>vs<br>Rap1 <sup>ieCKO</sup> ,PDGFRα(+) | **                                                                       | <0.0001 |         |
| Supple. Fig. 1b (Eln)        | Rap1 <sup>fl/fl</sup> ,CD31(+)   | 4 mice    |                                                                          |                                                                          |         |         |
|                              | Rap1 <sup>ieCKO</sup> ,CD31(+)   | 4 mice    |                                                                          |                                                                          |         |         |
|                              | Rap1 <sup>fl/fl</sup> ,PDGFRα(+) | 4 mice    |                                                                          |                                                                          |         |         |
|                              | Rap1 <sup>ieCKO</sup> ,PDGFRα(+) | 4 mice    |                                                                          |                                                                          |         |         |
|                              |                                  |           |                                                                          | Rap1 <sup>fl/fl</sup> ,CD31(+)<br>vs<br>Rap1 <sup>fl/fl</sup> ,PDGFRα(+) | **      | 0.001   |
|                              |                                  |           |                                                                          | Rap1 <sup>fl/fl</sup> ,CD31(+)<br>vs<br>Rap1 <sup>ieCKO</sup> ,PDGFRα(+) | **      | <0.0001 |

|                            |                                  |                     |                                                                    |      |         |
|----------------------------|----------------------------------|---------------------|--------------------------------------------------------------------|------|---------|
|                            |                                  |                     | Rap1 <sup>ieCKO</sup> ,CD31(+) vs Rap1 <sup>ef</sup> ,PDGFRα(+)    | **   | 0.0017  |
|                            |                                  |                     | Rap1 <sup>ieCKO</sup> ,CD31(+) vs Rap1 <sup>ieCKO</sup> ,PDGFRα(+) | **   | <0.0001 |
| Supple. Fig. 1c<br>(Rap1a) | Rap1 <sup>ef</sup> ,CD31(+)      | 4 mice              |                                                                    |      |         |
|                            | Rap1 <sup>ieCKO</sup> ,CD31(+)   | 4 mice              |                                                                    |      |         |
|                            | Rap1 <sup>ef</sup> ,PDGFRα(+)    | 4 mice              |                                                                    |      |         |
|                            | Rap1 <sup>ieCKO</sup> ,PDGFRα(+) | 4 mice              |                                                                    |      |         |
|                            |                                  |                     | Rap1 <sup>ef</sup> ,CD31(+) vs Rap1 <sup>ieCKO</sup> ,CD31(+)      | **   | <0.0001 |
|                            |                                  |                     | Rap1 <sup>ef</sup> ,PDGFRα(+) vs Rap1 <sup>ieCKO</sup> ,PDGFRα(+)  | N.S. | >0.9999 |
| Supple. Fig. 1c<br>(Rap1b) | Rap1 <sup>ef</sup> ,CD31(+)      | 4 mice              |                                                                    |      |         |
|                            | Rap1 <sup>ieCKO</sup> ,CD31(+)   | 4 mice              |                                                                    |      |         |
|                            | Rap1 <sup>ef</sup> ,PDGFRα(+)    | 4 mice              |                                                                    |      |         |
|                            | Rap1 <sup>ieCKO</sup> ,PDGFRα(+) | 4 mice              |                                                                    |      |         |
|                            |                                  |                     | Rap1 <sup>ef</sup> ,CD31(+) vs Rap1 <sup>ieCKO</sup> ,CD31(+)      | **   | <0.0001 |
|                            |                                  |                     | Rap1 <sup>ef</sup> ,PDGFRα(+) vs Rap1 <sup>ieCKO</sup> ,PDGFRα(+)  | N.S. | >0.9999 |
| Supple. Fig. 1e            | Rap1 <sup>ef</sup>               | 7 mice              |                                                                    |      |         |
|                            | Rap1 <sup>ieCKO</sup>            | 7 mice              |                                                                    |      |         |
|                            |                                  |                     | Day 0: Rap1 <sup>ef</sup> vs Rap1 <sup>ieCKO</sup>                 | N.S. | 0.2922  |
|                            |                                  |                     | Day 4: Rap1 <sup>ef</sup> vs Rap1 <sup>ieCKO</sup>                 | N.S. | 0.8724  |
|                            |                                  |                     | Day 8: Rap1 <sup>ef</sup> vs Rap1 <sup>ieCKO</sup>                 | N.S. | 0.4266  |
|                            |                                  |                     | Day 14: Rap1 <sup>ef</sup> vs Rap1 <sup>ieCKO</sup>                | N.S. | 0.2148  |
| Supple. Fig. 1j            | Rap1 <sup>ef</sup>               | 5 mice              |                                                                    |      |         |
|                            | Rap1 <sup>ieCKO</sup>            | 5 mice              |                                                                    |      |         |
|                            |                                  |                     | Rap1 <sup>ef</sup> vs Rap1 <sup>ieCKO</sup>                        | N.S. | 0.7860  |
| Supple. Fig. 1l            | Rap1 <sup>ef</sup>               | 5 mice              |                                                                    |      |         |
|                            | Rap1 <sup>ieCKO</sup>            | 5 mice              |                                                                    |      |         |
|                            |                                  |                     | Rap1 <sup>ef</sup> vs Rap1 <sup>ieCKO</sup>                        | N.S. | 0.9178  |
| Supple. Fig. 1m            | Rap1 <sup>ef</sup>               | 5 mice              |                                                                    |      |         |
|                            | Rap1 <sup>ieCKO</sup>            | 5 mice              |                                                                    |      |         |
|                            |                                  |                     | Rap1 <sup>ef</sup> vs Rap1 <sup>ieCKO</sup>                        | N.S. | 0.2305  |
| Supple. Fig. 2e            | Rap1 <sup>ef</sup>               | 114 cells/12 images |                                                                    |      |         |
|                            | Rap1 <sup>ieCKO</sup>            | 85 cells/18 images  |                                                                    |      |         |
|                            |                                  |                     | Rap1 <sup>ef</sup> /Nucleus vs Rap1 <sup>ef</sup> /Cytoplasm       | **   | <0.0001 |
|                            |                                  |                     | Rap1 <sup>ieCKO</sup> /Nucleus vs Rap1 <sup>ieCKO</sup> /Cytoplasm | **   | <0.0001 |
|                            |                                  |                     | Rap1 <sup>ef</sup> /Nucleus vs Rap1 <sup>ieCKO</sup> /Nucleus      | N.S. | 0.2651  |

|                          |                              |                           |                                                                    |      |         |
|--------------------------|------------------------------|---------------------------|--------------------------------------------------------------------|------|---------|
|                          |                              |                           | Rap1 <sup>eff</sup> /Cytoplasm vs Rap1 <sup>ieCKO</sup> /Cytoplasm | N.S. | 0.6525  |
| Supple. Fig. 3f          | Rap1 <sup>ieCHet</sup> ;mTmG | 15 slices/3 mice          |                                                                    |      |         |
|                          | Rap1 <sup>ieCKO</sup> ;mTmG  | 13 slices/3 mice          |                                                                    |      |         |
|                          |                              |                           | Rap1 <sup>ieCHet</sup> ;mTmG vs Rap1 <sup>ieCKO</sup> ;mTmG        | **   | 0.0003  |
| Supple. Fig. 4a          | Rap1 <sup>eff</sup>          | 46 cells/3 mice           |                                                                    |      |         |
|                          | Rap1 <sup>ieCKO</sup>        | 41 cells/3 mice           |                                                                    |      |         |
|                          |                              |                           | Rap1 <sup>eff</sup> vs Rap1 <sup>ieCKO</sup>                       | *    | 0.0180  |
| Supple. Fig. 4b (RAP1A)  | Control                      | 5 independent experiments |                                                                    |      |         |
|                          | RAP1KD#1                     | 5 independent experiments |                                                                    |      |         |
|                          | RAP1KD#2                     | 5 independent experiments |                                                                    |      |         |
|                          |                              |                           | Control vs RAP1KD#1                                                | **   | <0.0001 |
|                          |                              |                           | Control vs RAP1KD#2                                                | **   | <0.0001 |
| Supple. Fig. 4b (RAP1B)  | Control                      | 5 independent experiments |                                                                    |      |         |
|                          | RAP1KD#1                     | 5 independent experiments |                                                                    |      |         |
|                          | RAP1KD#2                     | 5 independent experiments |                                                                    |      |         |
|                          |                              |                           | Control vs RAP1KD#1                                                | **   | 0.0014  |
|                          |                              |                           | Control vs RAP1KD#2                                                | **   | 0.0005  |
| Supple. Fig. 4d (COL4A1) | Control                      | 5 independent experiments |                                                                    |      |         |
|                          | RAP1KD#1                     | 5 independent experiments |                                                                    |      |         |
|                          | RAP1KD#2                     | 5 independent experiments |                                                                    |      |         |
|                          |                              |                           | Control vs RAP1KD#1                                                | N.S. | 0.9994  |
|                          |                              |                           | Control vs RAP1KD#2                                                | N.S. | 0.9885  |
| Supple. Fig. 4d (COL4A2) | Control                      | 5 independent experiments |                                                                    |      |         |
|                          | RAP1KD#1                     | 5 independent experiments |                                                                    |      |         |
|                          | RAP1KD#2                     | 5 independent experiments |                                                                    |      |         |
|                          |                              |                           | Control vs RAP1KD#1                                                | N.S. | 0.9682  |
|                          |                              |                           | Control vs RAP1KD#2                                                | N.S. | 0.1562  |
| Supple. Fig. 4f          | Control                      | 301 cells/26 images       |                                                                    |      |         |
|                          | RAP1KD#1                     | 293 cells/26 images       |                                                                    |      |         |

|                          |                                            |                                 |                                            |    |         |         |
|--------------------------|--------------------------------------------|---------------------------------|--------------------------------------------|----|---------|---------|
|                          | RAP1KD#2                                   | 313 cells/28 images             |                                            |    |         |         |
|                          |                                            |                                 | Control vs RAP1KD#1                        | ** | <0.0001 |         |
|                          |                                            |                                 | Control vs RAP1KD#2                        | ** | <0.0001 |         |
| Supple. Fig. 4i          | Control                                    | 17 images                       |                                            |    |         |         |
|                          | COL4A1 KD                                  | 17 images                       |                                            |    |         |         |
|                          |                                            |                                 | Control vs COL4A1 KD                       | ** | <0.0001 |         |
| Supple. Fig. 4j          | Control                                    | 4 independent experiments       |                                            |    |         |         |
|                          | COL4A1 KD                                  | 4 independent experiments       |                                            |    |         |         |
|                          |                                            |                                 | Control vs COL4A1 KD                       | ** | 0.0076  |         |
| Supple. Fig. 4l          | Control                                    | 14 images                       |                                            |    |         |         |
|                          | Anti-integrin $\beta$ 1                    | 14 images                       |                                            |    |         |         |
|                          |                                            |                                 | Control vs Anti-integrin $\beta$ 1         | *  | 0.0143  |         |
| Supple. Fig. 5a (Pecam1) | Itgb1 <sup>fl/fl</sup> ,CD31(+)            | 4 mice                          |                                            |    |         |         |
|                          | Itgb1 <sup>ieCKO</sup> ,CD31(+)            | 5 mice                          |                                            |    |         |         |
|                          | Itgb1 <sup>fl/fl</sup> ,PDGFR $\alpha$ (+) | 4 mice                          |                                            |    |         |         |
|                          | Itgb1 <sup>ieCKO</sup> ,PDGFR $\alpha$ (+) | 5 mice                          |                                            |    |         |         |
|                          |                                            |                                 | Itgb1 <sup>fl/fl</sup> ,CD31(+)            | vs | **      | <0.0001 |
|                          |                                            |                                 | Itgb1 <sup>fl/fl</sup> ,PDGFR $\alpha$ (+) |    |         |         |
|                          |                                            |                                 | Itgb1 <sup>fl/fl</sup> ,CD31(+)            | vs | **      | <0.0001 |
|                          |                                            |                                 | Itgb1 <sup>ieCKO</sup> ,PDGFR $\alpha$ (+) |    |         |         |
| Supple. Fig. 5a (Eln)    | Itgb1 <sup>fl/fl</sup> ,CD31(+)            | 4 mice                          |                                            |    |         |         |
|                          | Itgb1 <sup>ieCKO</sup> ,CD31(+)            | 5 mice                          |                                            |    |         |         |
|                          | Itgb1 <sup>fl/fl</sup> ,PDGFR $\alpha$ (+) | 4 mice                          |                                            |    |         |         |
|                          | Itgb1 <sup>ieCKO</sup> ,PDGFR $\alpha$ (+) | 5 mice                          |                                            |    |         |         |
|                          |                                            |                                 | Itgb1 <sup>fl/fl</sup> ,CD31(+)            | vs | **      | 0.0063  |
|                          |                                            |                                 | Itgb1 <sup>fl/fl</sup> ,PDGFR $\alpha$ (+) |    |         |         |
|                          |                                            |                                 | Itgb1 <sup>fl/fl</sup> ,CD31(+)            | vs | **      | 0.0002  |
|                          |                                            |                                 | Itgb1 <sup>ieCKO</sup> ,PDGFR $\alpha$ (+) |    |         |         |
| Supple. Fig. 5b          | Itgb1 <sup>fl/fl</sup> ,CD31(+)            | 7 mice                          |                                            |    |         |         |
|                          | Itgb1 <sup>ieCKO</sup> ,CD31(+)            | 8 mice                          |                                            |    |         |         |
|                          | Itgb1 <sup>fl/fl</sup> ,PDGFR $\alpha$ (+) | 7 mice                          |                                            |    |         |         |
|                          | Itgb1 <sup>ieCKO</sup> ,PDGFR $\alpha$ (+) | 8 mice                          |                                            |    |         |         |
|                          |                                            |                                 | Itgb1 <sup>fl/fl</sup> ,CD31(+)            | vs | **      | 0.0099  |
|                          |                                            | Itgb1 <sup>ieCKO</sup> ,CD31(+) |                                            |    |         |         |

|  |  |  |                                            |      |        |
|--|--|--|--------------------------------------------|------|--------|
|  |  |  | Itgb1 <sup>fl</sup> ,PDGFR $\alpha$ (+) vs | N.S. | 0.1079 |
|  |  |  | Itgb1 <sup>ieCKO</sup> ,PDGFR $\alpha$ (+) |      |        |

Data were considered statistically significant if the p value was less than 0.05. No significant difference,  $p < 0.05$  and  $p < 0.01$  are shown as N.S., \*, and \*\*, respectively.
