# Supplementary material for: Endothelial cells regulate alveolar morphogenesis by constructing basement membranes acting as a scaffold for myofibroblasts
Source: PubMed Central journal article supplement (PMC10912381; doi:10.1038/s41467-024-45910-y), 2024-03-04
Supplement: 41467_2024_45910_MOESM3_ESM.pdf [file 41467_2024_45910_MOESM3_ESM.pdf]

## **Description of Additional Supplementary Files**

### **File Name: Supplementary Movie 1**

**Description:** 3D confocal image of anti- $\alpha$ -SMA antibody-stained alveoli in the lung of control mouse. See also Fig. 2c.

### **File Name: Supplementary Movie 2**

**Description:** 3D confocal image of anti- $\alpha$ -SMA antibody-stained alveoli in the lung of *Rap1<sup>iECKO</sup>* mouse. Note that myofibroblasts in *Rap1<sup>iECKO</sup>* mice had thinner  $\alpha$ -SMA filaments than control myofibroblasts (Supplementary Movie 1). See also Fig. 2c.

### **File Name: Supplementary Movie 3**

**Description:** 3D confocal image of Alexa Fluor 633-Hydrazide-stained Elastin fibers in the lung of control mouse. See also Fig. 3h.

### **File Name: Supplementary Movie 4**

**Description:** 3D confocal image of Alexa Fluor 633-Hydrazide-stained Elastin fibers in the lung of *Rap1<sup>iECKO</sup>* mouse. Note that myofibroblasts in *Rap1<sup>iECKO</sup>* mice had thinner Elastin fiber than control myofibroblasts (Supplementary Movie 3). See also Fig. 3h.
